# Supplementary material for: Control of oceanic circulation on sediment distribution in the southwestern Atlantic margin (23 to 55° S)
Source: Copernicus journal article supplement (doi:10.5194/os-17-1213-2021), 2021-09-15
Supplement: Supplementary file 1 [file os-17-1213-2021-supplement.zip]

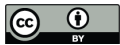

*Supplement of*

**Control of oceanic circulation on sediment distribution in the southwestern Atlantic margin (23 to 55° S)**

**Michel Michaelovitch de Mahiques et al.**

*Correspondence to:* Michel Michaelovitch de Mahiques (mahiques@usp.br)

- os-17-1213-2021-supplement-title-page.pdf
- SupplMat.xlsx

The copyright of individual parts of the supplement might differ from the article licence.
