# Supplementary material for: Control of oceanic circulation on sediment distribution in the southwestern Atlantic margin (23 to 55° S)
Source: Copernicus journal article supplement (doi:10.5194/os-17-1213-2021), 2021-09-15
Supplement: Supplementary file 2 [file os-17-1213-2021-supplement.zip]

Archive with 2 entries (2 files):
- os-17-1213-2021-supplement-title-page.pdf
- SupplMat.xlsx
